# Supplementary material for: Characterization of multifunctional β-NaEuF4/NaGdF4 core–shell nanoparticles with narrow size distribution
Source: Royal Society of Chemistry journal article supplement (doi:10.1039/c5nr06915g), 2015-12-28
Supplement: c5nr06915g1.pdf [file c5nr06915g1.pdf]

Supplementary Information for:

## Characterization of the optical, electronic and magnetic properties of multifunctional $\beta$ -NaEuF<sub>4</sub>/NaGdF<sub>4</sub> core-shell nanoparticles with narrow size distribution

Lilli Schneider, Thorben Rinkel, Benjamin Voß, Artur Chrobak, Johann P. Klare, Jan Neethling, Jaco Olivier, Dominik Schaniel, El-Eulmi Bendeif, Federica Bondino, Elena Magnano, Igor Pis, Kamil Balinski, Joachim Wollschläger, Heinz-Jürgen Steinhoff, Markus Haase, and Karsten Kuepper

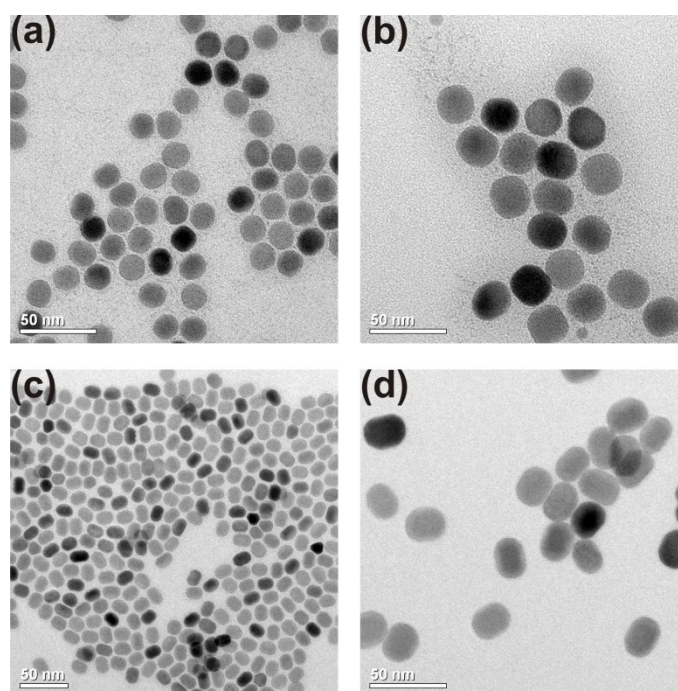

**Figure S 1:** TEM images of (a) 20 nm  $\beta$ -NaEuF<sub>4</sub>/NaGdF<sub>4</sub> core-shell nanoparticles with 3 nm  $\beta$ -NaEuF<sub>4</sub> core, (b) 22 nm  $\beta$ -NaGdF<sub>4</sub> nanoparticles doped with 1% Eu, (c) pure 18 nm NaEuF<sub>4</sub> nanoparticles and (d) 22 nm  $\beta$ -NaEuF<sub>4</sub>/NaGdF<sub>4</sub> core-shell nanoparticles with 18 nm  $\beta$ -NaEuF<sub>4</sub> core.

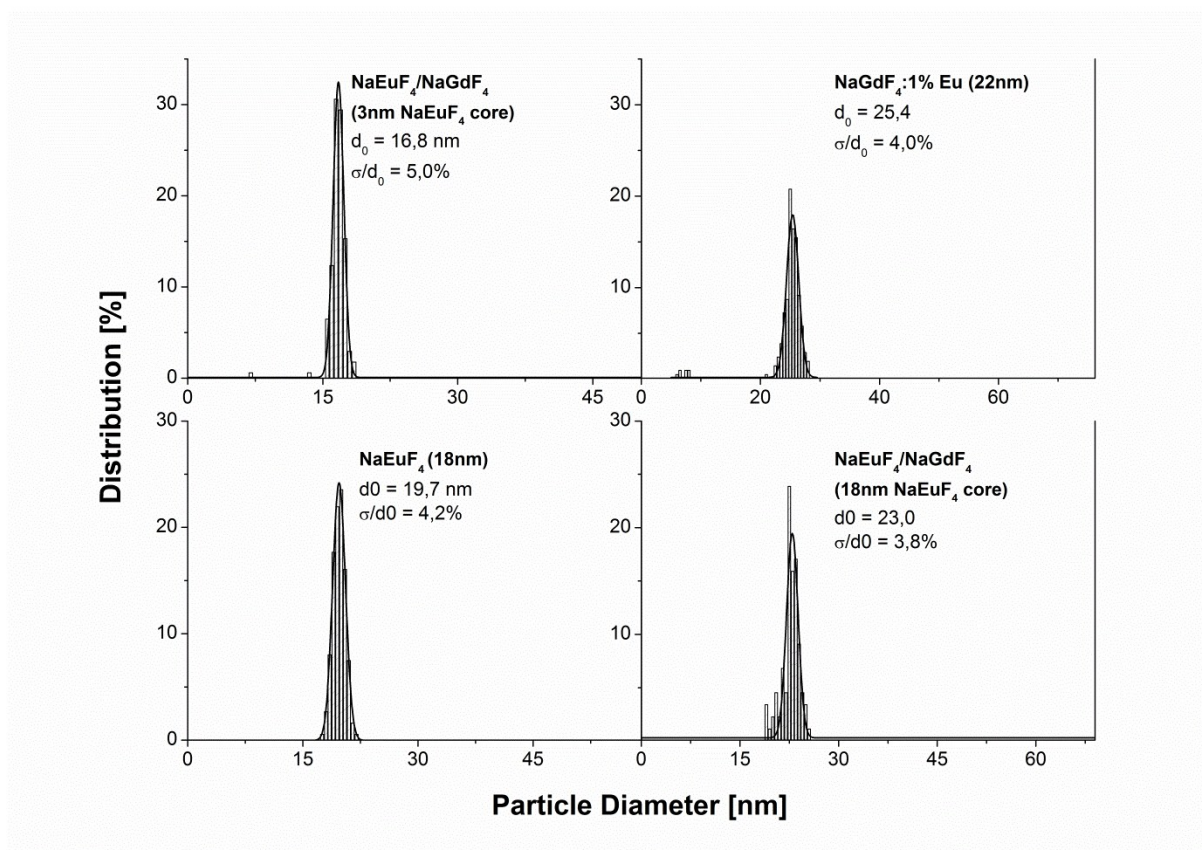

**Figure S 2:** Size histograms of  $\beta$ -NaEuF<sub>4</sub>/NaGdF<sub>4</sub> core-shell nanoparticles,  $\beta$ -NaGdF<sub>4</sub> nanoparticles doped with 1% Eu and pure NaEuF<sub>4</sub> nanoparticles.

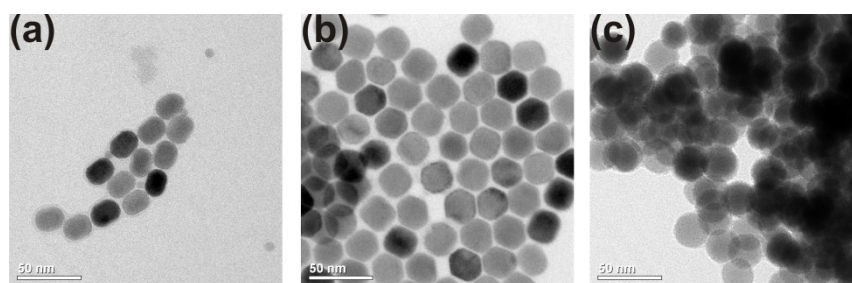

**Figure S 3:** TEM images of (a) 20 nm  $\beta$ -NaGdF<sub>4</sub>/NaEuF<sub>4</sub> core-shell nanoparticles with 3 nm  $\beta$ -NaGdF<sub>4</sub> core, (b) 22 nm  $\beta$ -NaEuF<sub>4</sub> nanoparticles doped with 1% Gd and (c) pure 22 nm NaEuF<sub>4</sub> nanoparticles.

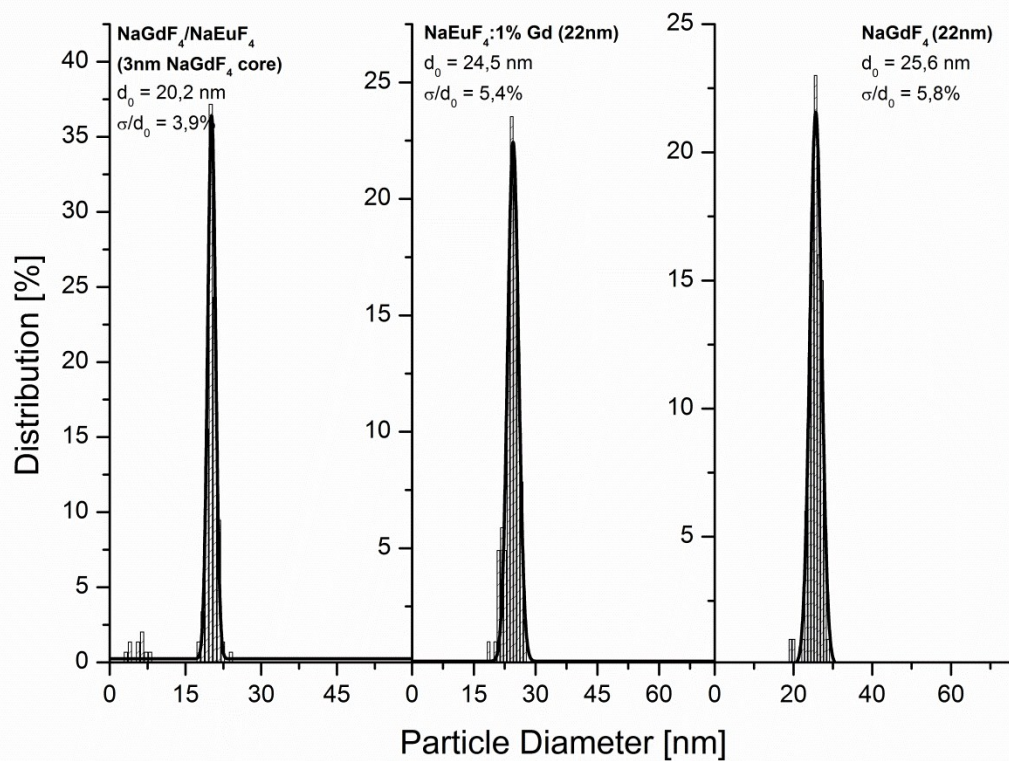

**Figure S 4:** Size histograms of  $\beta$ -NaGdF<sub>4</sub>/NaEuF<sub>4</sub> core-shell nanoparticles,  $\beta$ -NaEuF<sub>4</sub> nanoparticles doped with 1% Gd and pure NaGdF<sub>4</sub> nanoparticles.

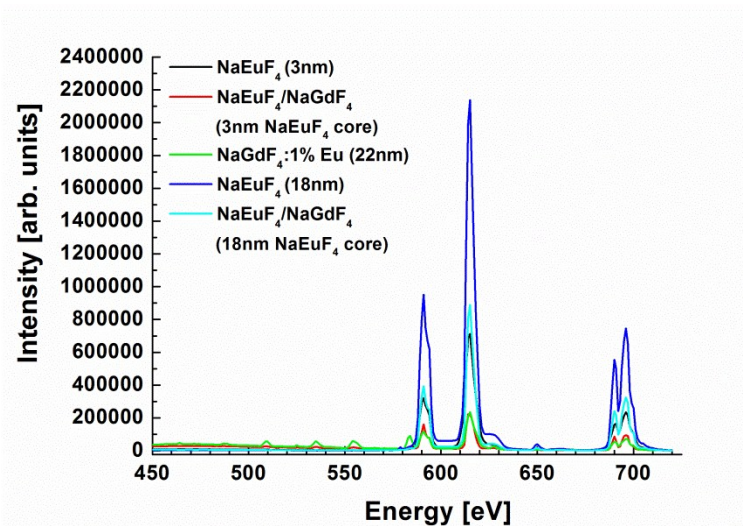

**Figure S 2:** Emission spectra of 3 nm  $\beta$ -NaEuF<sub>4</sub>, 20 nm  $\beta$ -NaEuF<sub>4</sub>/NaGdF<sub>4</sub> NPs with a 3 nm core, 22 nm  $\beta$ -NaGdF<sub>4</sub> NP doped with 1% Eu, 18 nm  $\beta$ -NaEuF<sub>4</sub> and 22 nm  $\beta$ -NaEuF<sub>4</sub>/NaGdF<sub>4</sub> NPs with a 18 nm  $\beta$ -NaEuF<sub>4</sub> core. The spectra were recorded under 394 nm excitation of the Eu<sup>3+</sup> ions.

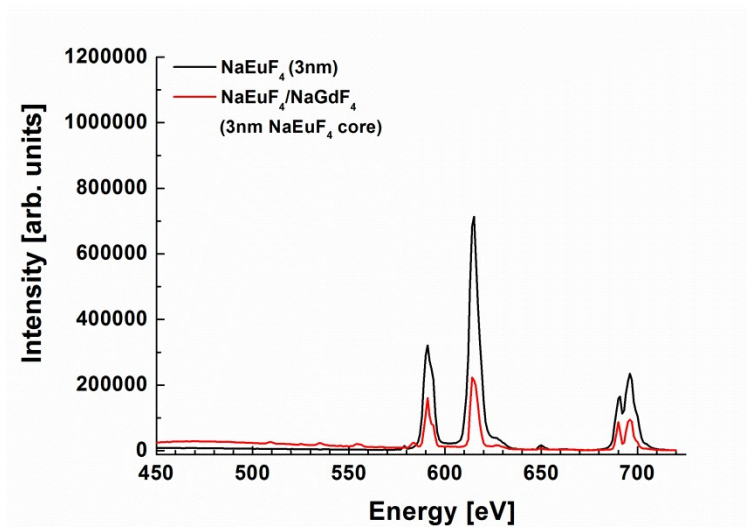

**Figure S 3:** Emission spectra of 3 nm  $\beta$ -NaEuF<sub>4</sub> and 20 nm  $\beta$ -NaEuF<sub>4</sub>/NaGdF<sub>4</sub> NPs with 3 nm  $\beta$ -NaEuF<sub>4</sub> core.

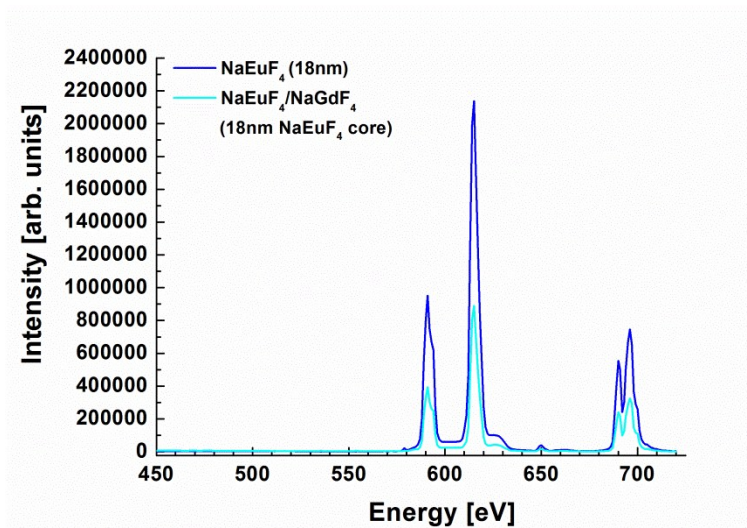

**Figure S 4:** Emission spectra of 18 nm  $\beta$ -NaEuF<sub>4</sub> and 22 nm  $\beta$ -NaEuF<sub>4</sub>/NaGdF<sub>4</sub> NPs with 18 nm  $\beta$ -NaEuF<sub>4</sub> core.
